# Supplementary material
Source: publisher figshare collection journal article supplement (https://gsapubs.figshare.com/articles/dataset/_/12532979)
Supplement: Supplementary file 1 [file 1]

| Depth (mm) | $\delta^{13}\text{C}$ (‰, vPDB) | $\delta^{18}\text{O}$ (‰, vPDB) | UVf time series | Depth (mm) | $\delta^{13}\text{C}$ (‰, vPDB) | $\delta^{18}\text{O}$ (‰, vPDB) | UVf time series | Depth (mm) | $\delta^{13}\text{C}$ (‰, vPDB) | $\delta^{18}\text{O}$ (‰, vPDB) | UVf time series | Depth (mm) | $\delta^{13}\text{C}$ (‰, vPDB) | $\delta^{18}\text{O}$ (‰, vPDB) | UVf time series |
|------------|---------------------------------|---------------------------------|-----------------|------------|---------------------------------|---------------------------------|-----------------|------------|---------------------------------|---------------------------------|-----------------|------------|---------------------------------|---------------------------------|-----------------|
| 0.25       | -4.90                           | -6.92                           | NA              | 14.75      | -4.12                           | -7.35                           | 1C-5            | 29.25      | -3.22                           | -6.72                           | 1C-3            | 43.75      | -3.08                           | -6.57                           | 1C-2            |
| 0.75       | -3.89                           | -6.76                           | NA              | 15.25      | -5.75                           | -6.74                           | NA              | 29.75      | -3.80                           | -6.68                           | 1C-3            | 44.25      | -3.24                           | -6.32                           | 1C-2            |
| 1.25       | -4.56                           | -6.41                           | NA              | 15.75      | -4.95                           | -6.34                           | NA              | 30.25      | -3.31                           | -7.01                           | 1C-3            | 44.75      | -2.72                           | -6.37                           | NA              |
| 1.75       | -4.48                           | -7.28                           | NA              | 16.25      | -4.95                           | -7.15                           | NA              | 30.75      | -3.26                           | -6.86                           | 1C-3            | 45.25      | -2.08                           | -6.00                           | NA              |
| 2.25       | -5.51                           | -6.84                           | NA              | 16.75      | -5.29                           | -6.99                           | NA              | 31.25      | -3.29                           | -6.72                           | 1C-3            | 45.75      | 0.05                            | -5.98                           | NA              |
| 2.75       | -5.03                           | -6.72                           | NA              | 17.25      | -3.75                           | -6.63                           | <b>1915</b>     | 31.75      | -2.66                           | -7.09                           | 1C-3            | 46.25      | -0.55                           | -5.93                           | NA              |
| 3.25       | -5.74                           | -6.96                           | NA              | 17.75      | -2.19                           | -7.03                           | NA              | 32.25      | -2.95                           | -6.92                           | 1C-3            | 46.75      | -0.19                           | -5.74                           | NA              |
| 3.75       | -5.08                           | -7.32                           | NA              | 18.25      | -1.37                           | -7.02                           | 1C-4            | 32.75      | -3.41                           | -6.78                           | 1C-3            | 47.25      | -1.21                           | -5.57                           | NA              |
| 4.25       | -4.67                           | -7.28                           | <b>796</b>      |            |                                 |                                 | 1C-4            | 33.25      | -3.07                           | -6.40                           | 1C-3            | 47.75      | -2.86                           | -6.68                           | NA              |
| 4.75       | -4.41                           | -7.17                           | 1C-6            | 19.25      | -1.12                           | -7.18                           | 1C-4            | 33.75      | -3.03                           | -6.57                           | NA              | 48.25      | -2.35                           | -6.48                           | <b>4631</b>     |
| 5.25       | -4.26                           | -7.31                           | 1C-6            | 19.75      | -2.22                           | -7.06                           | 1C-4            | 34.25      | -3.17                           | -6.75                           | NA              | 48.75      | -1.93                           | -6.64                           | 1C-1            |
| 5.75       | -4.22                           | -7.25                           | 1C-6            | 20.25      | -4.12                           | -6.97                           | 1C-4            | 34.75      | -3.03                           | -6.34                           | 1C-2            | 49.25      | -1.44                           | -6.33                           | 1C-1            |
| 6.25       | -4.18                           | -7.26                           | 1C-6            | 20.75      | -3.81                           | -6.97                           | 1C-4            | 35.25      | -3.08                           | -6.55                           | 1C-2            | 49.75      | -4.15                           | -6.76                           | 1C-1            |
| 6.75       | -2.92                           | -7.10                           | 1C-6            | 21.25      | -3.55                           | -6.72                           | 1C-3            | 35.75      | -2.92                           | -6.35                           | 1C-2            | 50.25      | -2.53                           | -6.69                           | 1C-1            |
| 7.25       | -4.37                           | -7.27                           | 1C-6            | 21.75      | -3.67                           | -6.98                           | 1C-3            | 36.25      | -2.93                           | -6.62                           | 1C-2            | 50.75      | -2.44                           | -6.85                           | 1C-1            |
| 7.75       | -4.31                           | -7.05                           | 1C-6            | 22.25      | -4.50                           | -6.86                           | <b>2578</b>     | 36.75      | -2.44                           | -6.31                           | 1C-2            | 51.25      | -3.00                           | -7.02                           | 1C-1            |
| 8.25       | -2.88                           | -7.06                           | 1C-6            | 22.75      | -3.81                           | -6.89                           | 1C-3            | 37.25      | -2.18                           | -6.72                           | 1C-2            | 51.75      | -3.46                           | -7.12                           | 1C-1            |
| 8.75       | -4.24                           | -6.98                           | NA              | 23.25      | -3.41                           | -6.85                           | 1C-3            | 37.75      | -2.79                           | -6.45                           | 1C-2            | 52.25      | -2.75                           | -6.70                           | 1C-1            |
| 9.25       | -4.84                           | -7.51                           | NA              | 23.75      | -3.95                           | -6.84                           | 1C-3            | 38.25      | -3.23                           | -7.00                           | 1C-2            | 52.75      | -2.46                           | -6.56                           | 1C-1            |
|            |                                 |                                 | 1C-5            | 24.25      | -3.89                           | -6.76                           | 1C-3            | 38.75      | -1.10                           | -6.53                           | 1C-2            | 53.25      | -3.18                           | -6.59                           | 1C-1            |
| 10.25      | -4.94                           | -7.43                           | 1C-5            | 24.75      | -3.44                           | -6.59                           | 1C-3            | 39.25      | -1.06                           | -6.42                           | 1C-2            | 53.75      | -3.48                           | -6.56                           | 1C-1            |
| 10.75      | -5.30                           | -7.34                           | 1C-5            | 25.25      | -2.73                           | -7.31                           | 1C-3            | 39.75      | -2.48                           | -6.62                           | 1C-2            | 54.25      | -2.97                           | -6.72                           | 1C-1            |
| 11.25      | -5.13                           | -7.40                           | 1C-5            | 25.75      | -1.76                           | -6.76                           | 1C-3            | 40.25      | -3.55                           | -6.61                           | 1C-2            | 54.75      | -3.27                           | -6.55                           | 1C-1            |
| 11.75      | -5.40                           | -7.28                           | 1C-5            | 26.25      | -2.46                           | -6.92                           | 1C-3            | 40.75      | -3.69                           | -6.47                           | 1C-2            | 55.25      | -3.56                           | -6.35                           | <b>5116</b>     |
| 12.25      | -5.21                           | -7.30                           | 1C-5            | 26.75      | -4.01                           | -6.72                           | 1C-3            | 41.25      | -2.84                           | -6.52                           | 1C-2            | 55.75      | -4.15                           | -6.87                           | 1C-1            |
| 12.75      | -5.33                           | -6.69                           | 1C-5            | 27.25      | -3.99                           | -6.67                           | 1C-3            | 41.75      | -2.98                           | -6.30                           | 1C-2            | 56.25      | -4.70                           | -6.78                           | 1C-1            |
| 13.25      | -4.92                           | -7.14                           | 1C-5            | 27.75      | -3.96                           | -6.91                           | 1C-3            | 42.25      | -3.72                           | -7.08                           | 1C-2            | 56.75      | -4.39                           | -6.85                           | 1C-1            |
| 13.75      | -5.30                           | -7.51                           | 1C-5            | 28.25      | -3.47                           | -6.81                           | 1C-3            | 42.75      | -2.92                           | -6.52                           | 1C-2            | 57.25      | -5.32                           | -6.73                           | 1C-1            |
| 14.25      | -4.30                           | -7.47                           | 1C-5            | 28.75      | -3.67                           | -6.91                           | 1C-3            | 43.25      | -1.50                           | -6.64                           | 1C-2            | 57.75      |                                 |                                 | 1C-1            |

Supplement 2. Summary of sample depths (measured downward from top of speleothem), stable C and O isotope values (measured from 0.5 mm drilled samples), and UV fluorescent time series (UVf). **Bold numbers** are U/Th ages shown in Figure 1. Gaps reflect either lost stable isotope samples or insufficient CO<sub>2</sub> evolved for analysis. NA indicates absence of UV fluorescent bands that could be measured and counted.

| Depth (mm) | $\delta^{13}\text{C}$ (‰, vPDB) | $\delta^{18}\text{O}$ (‰, vPDB) | UVf time-series | Depth (mm) | $\delta^{13}\text{C}$ (‰, vPDB) | $\delta^{18}\text{O}$ (‰, vPDB) | UVf time-series | Depth (mm) | $\delta^{13}\text{C}$ (‰, vPDB) | $\delta^{18}\text{O}$ (‰, vPDB) | UVf time-series | Depth (mm) | $\delta^{13}\text{C}$ (‰, vPDB) | $\delta^{18}\text{O}$ (‰, vPDB) | UVf time-series |
|------------|---------------------------------|---------------------------------|-----------------|------------|---------------------------------|---------------------------------|-----------------|------------|---------------------------------|---------------------------------|-----------------|------------|---------------------------------|---------------------------------|-----------------|
| 58.25      | -5.25                           | -6.69                           | 1C-1            |            |                                 |                                 | 1B-3            | 87.25      | -5.26                           | -6.76                           | 1B-2            | 101.75     | -4.49                           | -6.71                           | 1B-1            |
| 58.75      | -3.97                           | -6.58                           | 1C-1            | 73.25      | -6.23                           | -7.20                           | 1B-3            | 87.75      | -5.36                           | -6.99                           | NA              | 102.25     | -3.00                           | -6.27                           | terra rossa     |
| 59.25      | -3.77                           | -6.76                           | 1C-1            | 73.75      | -5.59                           | -6.66                           | 1B-3            | 88.25      | -5.88                           | -6.64                           | NA              | 102.75     | -5.04                           | -6.38                           | NA              |
| 59.75      | -3.65                           | -6.93                           | 1C-1            | 74.25      | -5.64                           | -7.03                           | 1B-3            | 88.75      | -4.58                           | -6.59                           | NA              | 103.25     | -4.62                           | -6.91                           | NA              |
| 60.25      | -3.41                           | -7.15                           | 1C-1            | 74.75      | -5.14                           | -6.72                           | 1B-3            | 89.25      | -4.48                           | -6.70                           | 1B-1            | 103.75     | -5.11                           | -6.92                           | NA              |
| 60.75      | -2.67                           | -7.21                           | 1C-1            | 75.25      | -4.85                           | -7.02                           | <b>6173</b>     | 89.75      | -3.50                           | -6.90                           | 1B-1            |            |                                 |                                 |                 |
| 61.25      | -1.93                           | -6.97                           | 1C-1            | 75.75      | -5.33                           | -6.94                           | 1B-3            |            |                                 |                                 | 1B-1            |            |                                 |                                 |                 |
| 61.75      | -2.47                           | -6.99                           | 1C-1            | 76.25      | -5.45                           | -7.05                           | 1B-3            | 90.75      | -2.73                           | -7.01                           | 1B-1            |            |                                 |                                 |                 |
| 62.25      | -2.51                           | -7.02                           | 1C-1            | 76.75      | -5.41                           | -7.23                           | NA              | 91.25      | -1.95                           | -7.36                           | 1B-1            |            |                                 |                                 |                 |
| 62.75      | -2.07                           | -6.53                           | NA              | 77.25      | -5.33                           | -7.26                           | 1B-2            | 91.75      | -1.69                           | -7.09                           | 1B-1            |            |                                 |                                 |                 |
| 63.25      | -2.72                           | -7.00                           | NA              | 77.75      | -4.80                           | -6.83                           | 1B-2            | 92.25      | -1.82                           | -7.08                           | 1B-1            |            |                                 |                                 |                 |
| 63.75      | -2.79                           | -6.58                           | 1B-3            | 78.25      | -4.91                           | -7.04                           | 1B-2            | 92.75      | -2.86                           | -7.12                           | 1B-1            |            |                                 |                                 |                 |
| 64.25      | -2.95                           | -6.59                           | 1B-3            | 78.75      | -4.19                           | -7.20                           | 1B-2            | 93.25      | -2.99                           | -7.14                           | 1B-1            |            |                                 |                                 |                 |
| 64.75      | -2.66                           | -6.45                           | 1B-3            | 79.25      | -4.58                           | -7.26                           | 1B-2            | 93.75      | -2.66                           | -6.60                           | 1B-1            |            |                                 |                                 |                 |
| 65.25      | -2.82                           | -6.43                           | 1B-3            | 79.75      | -4.29                           | -7.07                           | 1B-2            | 94.25      | -2.38                           | -6.94                           | 1B-1            |            |                                 |                                 |                 |
| 65.75      | -3.04                           | -7.11                           | 1B-3            | 80.25      | -4.15                           | -7.12                           | 1B-2            | 94.75      | -2.58                           | -7.11                           | 1B-1            |            |                                 |                                 |                 |
| 66.25      | -3.68                           | -6.87                           | 1B-3            |            |                                 |                                 | 1B-2            | 95.25      | -3.03                           | -7.02                           | 1B-1            |            |                                 |                                 |                 |
| 66.75      | -3.29                           | -6.86                           | 1B-3            | 81.25      | -4.95                           | -7.10                           | <b>6531</b>     | 95.75      | -2.44                           | -6.90                           | 1B-1            |            |                                 |                                 |                 |
| 67.25      | -2.52                           | -6.68                           | 1B-3            | 81.75      | -3.94                           | -7.04                           | 1B-2            | 96.25      | -2.19                           | -6.77                           | 1B-1            |            |                                 |                                 |                 |
| 67.75      | -3.20                           | -7.08                           | 1B-3            | 82.25      | -4.42                           | -7.06                           | 1B-2            | 96.75      | -1.74                           | -6.94                           | 1B-1            |            |                                 |                                 |                 |
| 68.25      | -3.59                           | -6.68                           | 1B-3            | 82.75      | -4.38                           | -6.86                           | 1B-2            | 97.25      | -1.70                           | -6.85                           | 1B-1            |            |                                 |                                 |                 |
| 68.75      | -3.55                           | -6.72                           | 1B-3            | 83.25      | -3.84                           | -6.97                           | 1B-2            | 97.75      | -1.55                           | -6.54                           | 1B-1            |            |                                 |                                 |                 |
| 69.25      | -4.00                           | -6.55                           | 1B-3            | 83.75      | -4.59                           | -7.05                           | 1B-2            | 98.25      | -1.55                           | -6.77                           | 1B-1            |            |                                 |                                 |                 |
| 69.75      | -3.77                           | -6.66                           | 1B-3            | 84.25      | -5.06                           | -7.02                           | 1B-2            | 98.75      | -1.43                           | -6.44                           | 1B-1            |            |                                 |                                 |                 |
| 70.25      | -3.06                           | -6.46                           | 1B-3            | 84.75      | -5.52                           | -6.90                           | 1B-2            | 99.25      | -1.37                           | -7.01                           | 1B-1            |            |                                 |                                 |                 |
| 70.75      | -4.58                           | -6.76                           | 1B-3            | 85.25      | -5.40                           | -6.90                           | 1B-2            | 99.75      | -2.30                           | -6.73                           | 1B-1            |            |                                 |                                 |                 |
| 71.25      | -6.18                           | -6.94                           | 1B-3            | 85.75      | -5.98                           | -7.01                           | 1B-2            | 100.25     | -1.67                           | -7.08                           | <b>7416</b>     |            |                                 |                                 |                 |
| 71.75      | -6.02                           | -6.98                           | 1B-3            | 86.25      | -5.72                           | -7.06                           | 1B-2            | 100.75     | -3.75                           | -6.81                           | 1B-1            |            |                                 |                                 |                 |
|            |                                 |                                 | 1B-3            | 86.75      | -4.97                           | -7.21                           | 1B-2            | 101.25     | -4.95                           | -6.68                           | 1B-1            |            |                                 |                                 |                 |

Supplement 2 (cont'd).
